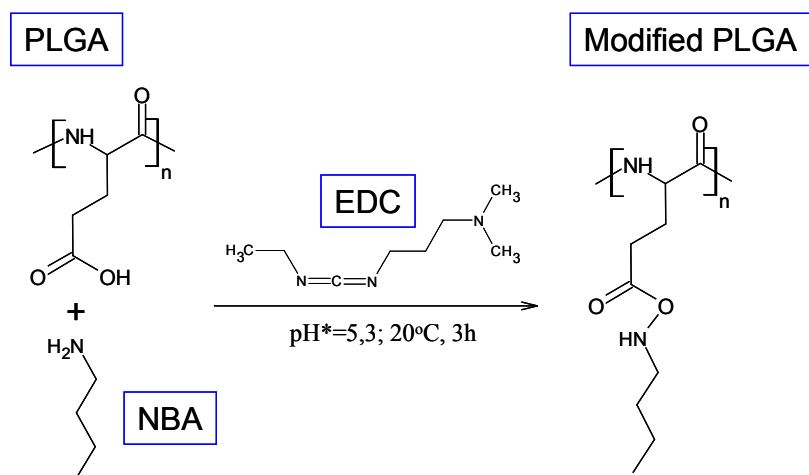

**Figure S1.**

The procedure of inducing defects in PLGA by covalent modifications of Glu side chains with EDC and primary amines explained on NBA example. Solutions of PLGA and NBA in D<sub>2</sub>O were mixed (at 1:3 Glu side chain : NBA molar ratio), followed by pH\* adjustment to 5.3. Subsequently, the reaction was initiated by adding desired amounts of EDC and stirring at 20 °C for 3 h.
