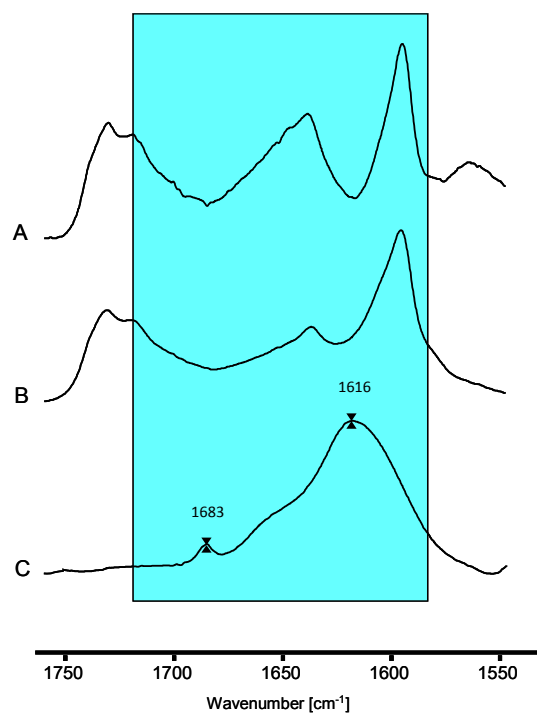

**Figure S2.**

FT-IR spectra of: (A) PLGA incubated with NBA (at 1:3 Glu-side-chain:NBA molar ratio) in D<sub>2</sub>O at pH\* 4.3 / 65°C; (B) PLGA incubated with EDC (at 1:1.5 Glu-side-chain:EDC molar ratio) in D<sub>2</sub>O at pH\* 4.3 / 65°C; (C) PLGA incubated with NBA and EDC (at 1:3:1.5 Glu-side-chain:NBA:EDC molar ratio) in D<sub>2</sub>O at pH\* 4.3 / 65°C. Blue rectangle marks amide I/I' band region.
